# Supplementary material
Source: Research Square preprint supplement (doi:10.21203/rs.3.rs-8714217/v1)
Supplement: Supplementary file 1 [file 2b0a163eb9c282ea67f3f3d9.docx]

**Supplementary Material**

**Metal contamination in residential snow and indoor dust near the Horne copper smelter: a citizen-science study in Rouyn-Noranda, Quebec**

**Authors:**
Ernest-Louli Tewfik¹, Émilie Robert², Maryse F. Bouchard¹

**Affiliations:**
¹ Centre Armand-Frappier Santé Biotechnologie, Institut national de la recherche scientifique (INRS), Laval, Quebec, Canada
² Mères au front de Rouyn-Noranda, Rouyn-Noranda, Quebec, Canada

**Corresponding author:**
Maryse F. Bouchard
Centre Armand-Frappier Santé-Biotechnologie
Institut national de la recherche scientifique (INRS)
531 Boulevard des Prairies, Laval, QC, Canada
Email: maryse.bouchard@inrs.ca
ORCID: 0000-0001-6246-4802

**Inverse power model**

To model the relationships between metal concentrations and distance from the smelter, we compared linear, inverse power, and exponential decay models and selected the model with the best predictive performance based on R² values. For most metal concentrations measured in snow and indoor dust, distance from the smelter was best described by an inverse power model. Accordingly, the relationships between concentrations in snow and indoor dust and distance from the smelter were modeled using an inverse power function defined as follows:

(1)

(2)

where *distance* represents the distance between the residence and the main stack of the smelter.

Results are presented as the percentage change in concentration associated with a doubling of distance from the smelter (e.g., from 500 to 1,000 m), consistent with an inverse power relationship. These percentages were calculated using the expression (2b−1) × 100, where *b* is the regression coefficient.

**Methodological approach for constructing Figure 1**

To present a figure using linear scales for distance (x-axis) and concentration (y-axis), which were considered more intuitive for visualization, the curve derived from the linear regression—whose mathematical expression is given in Equation (1)—was transformed into a curve corresponding to Equation (2).

To preserve the confidentiality of residential addresses in Figure 1, a random distance of ±50 m was added to the distance from the smelter for each residence. The true distances were nevertheless used for all regression and correlation analyses.
