# Supplementary material
Source: Research Square preprint supplement (doi:10.21203/rs.3.rs-8714217/v1)
Supplement: Supplementary file 2 [file 5ac5b8f1b56ec741ec8f35f0.docx]

**Supplementary Material**

**Metal contamination in residential snow and indoor dust near the Horne Smelter: A citizen-science study in Rouyn-Noranda, Quebec**

**Authors:**
Ernest-Louli Tewfik¹, Émilie Robert², Maryse F. Bouchard¹

**Affiliations:**
¹ Centre Armand-Frappier Santé Biotechnologie, Institut national de la recherche scientifique (INRS), Laval, Quebec, Canada
² Mères au front de Rouyn-Noranda, Rouyn-Noranda, Quebec, Canada

**Corresponding author:**
Maryse F. Bouchard
Centre Armand-Frappier Santé-Biotechnologie
Institut national de la recherche scientifique (INRS)
531 Boulevard des Prairies, Laval, QC, Canada
Email: maryse.bouchard@inrs.ca
ORCID: 0000-0001-6246-4802

**Laboratory analysis: results of quality assurance and quality control (QA/QC) for concentrations in indoor dust**

CRM recoveries were within acceptable ranges for the main metals of interest (As: 94-102%, Pb: 93-96%, Zn: 96-99%, Cu: 102-113%). Method detection limits (MDLs) were 1.0 ppm for Pb and As, and 0.5 ppm for Cu, Cd, Zn, and Cr. Analytical precision was evaluated using replicate analyses. Relative percent differences (RPDs) were low for Pb, Cd, and Cu (RPDs of 2.7-13.6%, 0.1-8.6%, and 0.4-13%, respectively), indicating good reproducibility. Higher RPDs were observed for As, Zn and Cr (RPDs of 28.4-44.2%, 6.6-23.2% and 27.2-124.1%, respectively); this variability is consistent with the heterogeneous nature of indoor dust samples.

**Sensitivity analysis excluding outliers: methods**

We conducted a sensitivity analysis to assess the impact of outliers on model fit (R²) by removing outliers from linear regression models predicting log-transformed metal concentrations in indoor dust and in snow. Outliers in simple linear regression models for indoor dust and snow were detected using two complementary approaches, and a value was retained as an outlier only when flagged by both approaches:

1. Outliers were identified by visual inspection of log–log plots of concentration versus distance.
2. Externally studentized residuals. Observations with absolute studentized residuals ≥ 3 were classified as outliers. Values between 2 and 3 were further evaluated through visual inspection of plots of studentized residuals versus fitted values, and classified as outliers if they showed clear deviation from the overall residual pattern (DiMaggio, 2013).

For metal concentrations in snow models incorporating wind direction, only approach #2 was used, as a simple two-variable (distance–concentration) plot would not account for the combined effects of distance and wind direction on metal deposition.

**Sensitivity analysis excluding outliers: results**

Table S1. Coefficients of determination (R², %) from linear regression models of log-transformed metal concentrations in indoor dust as a function of log-transformed distance from smelter, with and without exclusion of outliers.

|  | Number of outliers | R2 excluding outliers | R2 including all observations |
| --- | --- | --- | --- |
| **Cu** | 2 | 69*** | 36** |
| **Pb** | 3 | 56*** | 29** |
| **Cd** | 0 | – | 33** |
| **As** | 1 | 23* | 15† |
| **Zn** | 3 | 46*** | 8 |
| **Cr** | 0 | – | 5 |

*** p < 0.001 ; ** p<0.01 ; * p<0.05 ; † p<0.10

p-values from the F-test for overall model significance

Table S2. Coefficients of determination (R², %) from linear regression models of log-transformed metal concentrations in snow as a function of log-transformed distance from smelter, with and without exclusion of outliers.

|  | Number of outliers | R2 excluding outliers | R2 including all observations |
| --- | --- | --- | --- |
| **Cu** | 0 | – | 41** |
| **Pb** | 2 | 44** | 31** |
| **Cd** | 3 | 21* | 29** |
| **As** | 1 | 37** | 15† |
| **Zn** | 1 | 10 | 35** |
| **Cr** | 0 | – | 26* |

** p<0.01 ; * p<0.05 ; † p<0.10

p-values from the F-test for overall model significance

Table S3. Coefficients of determination (R², %) from linear regression models of log-transformed metal concentrations in snow, adjusted for log-transformed distance from smelter as well as location with respect to wind direction, with and without exclusion of outliers.

|  | Number of outliers | R2 excluding outliers | R2 including all observations |
| --- | --- | --- | --- |
| **Cu** | 3 | 81*** | 73*** |
| **Pb** | 3 | 90*** | 58*** |
| **Cd** | 3 | 82*** | 58*** |
| **As** | 1 | 85*** | 56*** |
| **Zn** | 3 | 70*** | 44** |
| **Cr** | 0 | – | 73*** |

*** p < 0.001 ; ** p<0.01

p-values from the F-test for overall model significance

**REFERENCE**

DiMaggio, C. (2013). Regression Diagnostics. In C. DiMaggio (Ed.), *SAS for Epidemiologists: Applications and Methods* (pp. 213–229). Springer. https://doi.org/10.1007/978-1-4614-4854-9_14
